# Supplementary material
Source: PubMed Central journal article supplement (PMC3703829)
Supplement: NIHMS464744-supplement-3.pdf [file NIHMS464744-supplement-3.pdf]

# Supplemental Figure 3

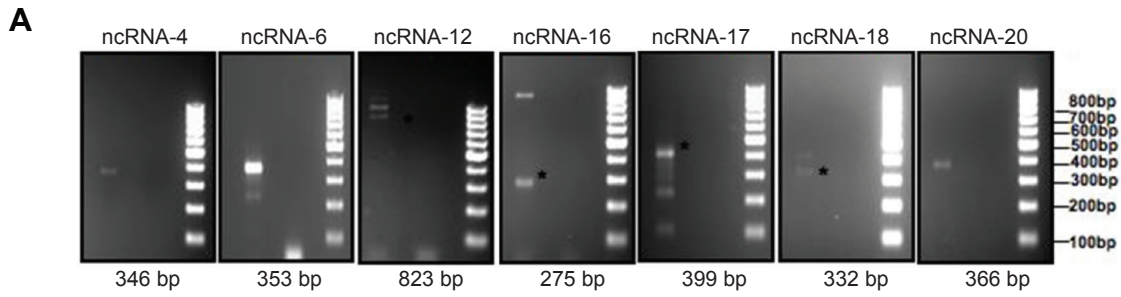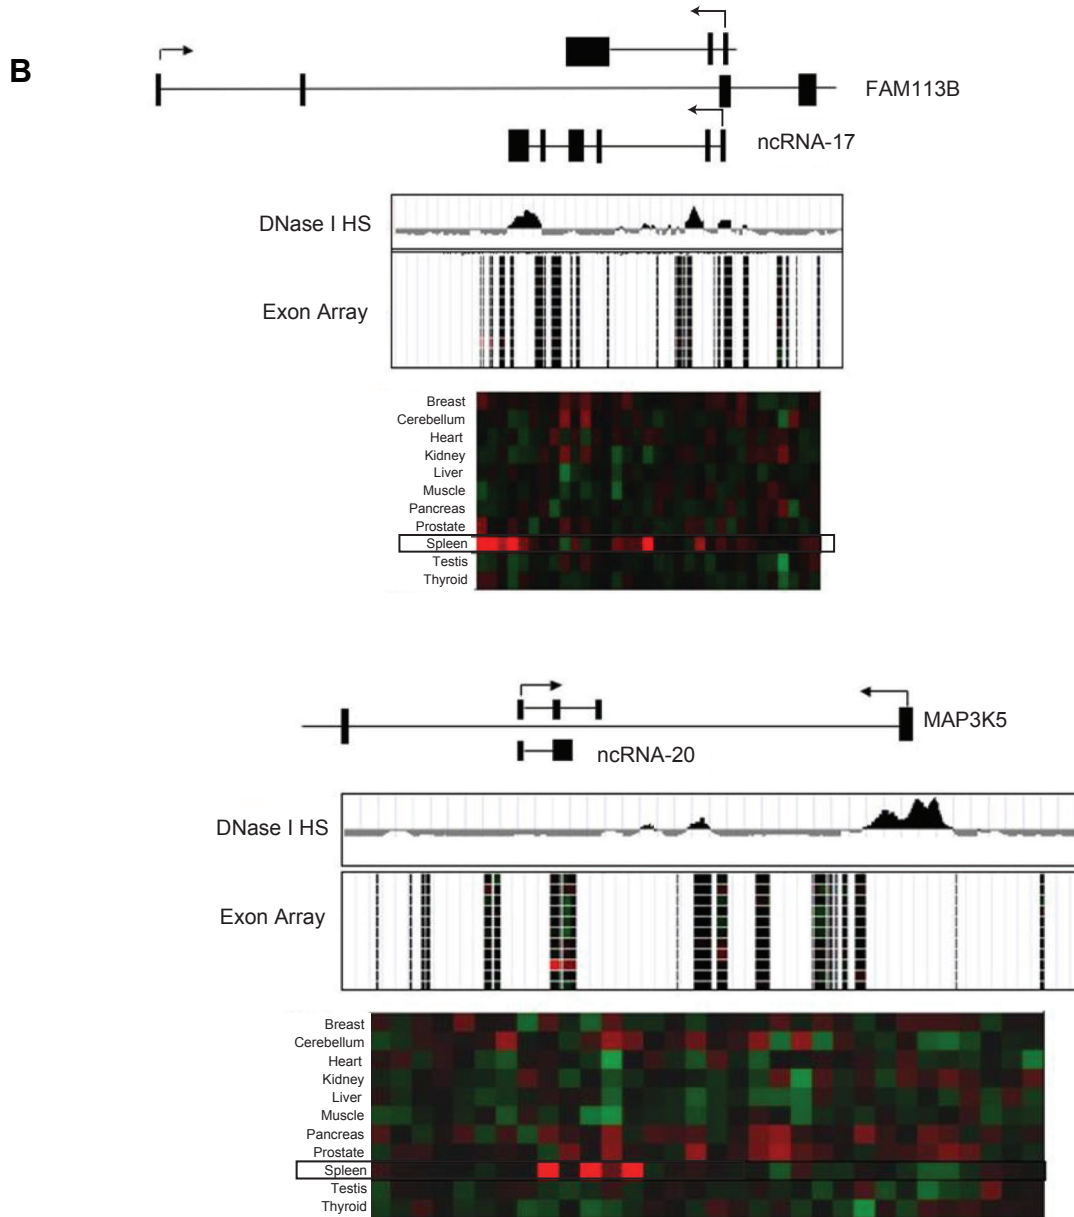

## C

| Unigene   | Refseq       | Description                                                                                                                   | Noncoding EST |
|-----------|--------------|-------------------------------------------------------------------------------------------------------------------------------|---------------|
| Hs.391835 | NM_000066    | complement component 8, beta polypeptide                                                                                      | CB161740      |
| Hs.1770   | NM_000234    | ligase I, DNA, ATP-dependent                                                                                                  | BM800021      |
| Hs.434961 | NM_000332    | ataxin 1                                                                                                                      | DB477374      |
| Hs.1498   | NM_000412    | histidine-rich glycoprotein                                                                                                   | AI765865      |
| Hs.591642 | NM_000465    | BRCA1 associated RING domain 1                                                                                                | DA865307      |
| Hs.450802 | NM_000579    | chemokine (C-C motif) receptor 5                                                                                              | AW968281      |
| Hs.333297 | NM_001001664 | speckle-type POZ protein-like                                                                                                 | BQ271370      |
| Hs.191179 | NM_001002814 | RAB11 family interacting protein 1 (class I)                                                                                  | BE547128      |
| Hs.208912 | NM_001002876 | centromere protein M                                                                                                          | BI196542      |
| Hs.584862 | NM_001003789 | RAB, member of RAS oncogene family-like 2B                                                                                    | CN394600      |
| Hs.381300 | NM_001008703 | chromosome 6 open reading frame 1                                                                                             | DC412744      |
| Hs.131436 | NM_001012426 | forkhead box P4                                                                                                               | BQ082169      |
| Hs.529385 | NM_001014279 | chromosome 5 open reading frame 39                                                                                            | DA461909      |
| Hs.436500 | NM_001014436 | drebrin-like                                                                                                                  | AL530624      |
| Hs.534206 | NM_001017520 | deoxynucleotidyltransferase, terminal                                                                                         | AL559471      |
| Hs.530970 | NM_001024808 | B-cell CLL/lymphoma 7A                                                                                                        | BG686031      |
| Hs.497332 | NM_001031725 | DEAD (Asp-Glu-Ala-Asp) box polypeptide 59                                                                                     | BI667199      |
| Hs.519702 | NM_001037333 | cytoplasmic FMR1 interacting protein 2                                                                                        | BQ073011      |
| Hs.256526 | NM_001038618 | nuclear prelamin A recognition factor<br>Rho GTPase activating protein 11B; Rho GTPase activating<br>protein 11A              | GR564527      |
| Hs.591130 | NM_001039841 |                                                                                                                               | DA288862      |
| Hs.166556 | NM_001040031 | CD37 molecule                                                                                                                 | DA970163      |
| Hs.578973 | NM_001042355 | cylindromatosis (turban tumor syndrome)                                                                                       | DA995051      |
| Hs.413099 | NM_001042543 | glycine receptor, alpha 3                                                                                                     | DB048181      |
| Hs.119023 | NM_001042551 | structural maintenance of chromosomes 2                                                                                       | DB068097      |
| Hs.440776 | NM_001077394 | DPH5 homolog ( <i>S. cerevisiae</i> )                                                                                         | DB163881      |
| Hs.50915  | NM_001077491 | kallikrein-related peptidase 5<br>leukocyte immunoglobulin-like receptor, subfamily B (with TM<br>and ITIM domains), member 3 | DB442754      |
| Hs.631592 | NM_001081450 |                                                                                                                               | BI910460      |
| Hs.445758 | NM_001083588 | E2F transcription factor 5, p130-binding                                                                                      | BX094626      |
| Hs.519972 | NM_001098479 | major histocompatibility complex, class I, F                                                                                  | DB084548      |
| Hs.2484   | NM_001098725 | T-cell leukemia/lymphoma 1A                                                                                                   | BG532221      |
| Hs.647086 | NM_001099695 | replication initiator 1                                                                                                       | DA432077      |
| Hs.270851 | NM_001102653 | OTU domain containing 4                                                                                                       | AI286100      |
| Hs.513126 | NM_001113378 | Fanconi anemia, complementation group I                                                                                       | DB047073      |
| Hs.211571 | NM_001122608 | holocytochrome c synthase (cytochrome c heme-lyase)                                                                           | CN272434      |
| Hs.363308 | NM_001126340 | ORAI calcium release-activated calcium modulator 2                                                                            | DA177224      |
| Hs.647623 | NM_001127691 | Rh blood group, D antigen                                                                                                     | DB126789      |
| Hs.444389 | NM_001128930 | ectonucleoside triphosphate diphosphohydrolase 4                                                                              | BU195360      |
| Hs.631890 | NM_001130480 | vaccinia related kinase 2                                                                                                     | DB040868      |
| Hs.555947 | NM_001130713 | lymphoid enhancer-binding factor 1                                                                                            | BG722263      |
| Hs.492261 | NM_001135733 | tumor protein p53 inducible nuclear protein 1                                                                                 | AA935331      |
| Hs.306291 | NM_001142279 | ribonuclease H2, subunit B                                                                                                    | BF574759      |
| Hs.196129 | NM_001142326 | cyclin D binding myb-like transcription factor 1                                                                              | AA527254      |
| Hs.150651 | NM_001142519 | family with sequence similarity 111, member A                                                                                 | BG541840      |
| Hs.520506 | NM_001142522 | F-box protein 5                                                                                                               | CN389282      |
| Hs.278901 | NM_001142633 | phosphoinositide-3-kinase, regulatory subunit 5                                                                               | AW503309      |

|           |              |                                                                                                                   |          |
|-----------|--------------|-------------------------------------------------------------------------------------------------------------------|----------|
| Hs.186579 | NM_001142703 | family with sequence similarity 111, member B                                                                     | BX385192 |
| Hs.654567 | NM_001144823 | DENN/MADD domain containing 4A                                                                                    | DA184037 |
| Hs.504534 | NM_001144958 | EF-hand calcium binding domain 4B                                                                                 | AA489744 |
| Hs.502875 | NM_001145138 | v-rel reticuloendotheliosis viral oncogene homolog A (avian)                                                      | CN260583 |
| Hs.119882 | NM_001145306 | cyclin-dependent kinase 6                                                                                         | BU963459 |
| Hs.77695  | NM_001146015 | discs, large (Drosophila) homolog-associated protein 5                                                            | CR741912 |
| Hs.521922 | NM_001162914 | similar to hCG1646697                                                                                             | BI829323 |
| Hs.234572 | NM_001163673 | WD repeat domain 81                                                                                               | CB994764 |
| Hs.29698  | NM_001164715 | similar to ZNF605 protein                                                                                         | BF438125 |
| Hs.655995 | NM_001166243 | fragile histidine triad gene                                                                                      | AV694138 |
| Hs.504281 | NM_001167681 | Friend leukemia virus integration 1                                                                               | BI489626 |
| Hs.525709 | NM_001168325 | tescalcin                                                                                                         | BM908196 |
| Hs.531926 | NM_001171992 | chromosome 6 open reading frame 223                                                                               | DB025548 |
| Hs.2556   | NM_001192    | tumor necrosis factor receptor superfamily, member 17                                                             | BG025764 |
| Hs.355307 | NM_001242    | CD27 molecule                                                                                                     | BX460388 |
| Hs.631925 | NM_001407    | solute carrier family 26, member 6; cadherin, EGF LAG seven-pass G-type receptor 3 (flamingo homolog, Drosophila) | BM714397 |
| Hs.272011 | NM_001497    | UDP-Gal:betaGlcNAc beta 1,4- galactosyltransferase, polypeptide 1                                                 | BQ233868 |
| Hs.83758  | NM_001827    | CDC28 protein kinase regulatory subunit 2                                                                         | DA320716 |
| Hs.591391 | NM_001925    | defensin, alpha 4, corticostatin                                                                                  | BX117347 |
| Hs.348418 | NM_001938    | down-regulator of transcription 1, TBP-binding (negative cofactor 2)                                              | BI760375 |
| Hs.1424   | NM_002021    | flavin containing monooxygenase 1                                                                                 | BX374996 |
| Hs.190783 | NM_002108    | histidine ammonia-lyase                                                                                           | BE785557 |
| Hs.845    | NM_002188    | interleukin 13                                                                                                    | DB462315 |
| Hs.591697 | NM_002358    | MAD2 mitotic arrest deficient-like 1 (yeast)                                                                      | DA825750 |
| Hs.202453 | NM_002467    | v-myc myelocytomatosis viral oncogene homolog (avian)                                                             | BM804611 |
| Hs.468840 | NM_002664    | pleckstrin                                                                                                        | BI821077 |
| Hs.145442 | NM_002755    | mitogen-activated protein kinase kinase 1                                                                         | R24333   |
| Hs.79361  | NM_002774    | kallikrein-related peptidase 6                                                                                    | DA412424 |
| Hs.631886 | NM_002908    | v-rel reticuloendotheliosis viral oncogene homolog (avian)                                                        | DA758462 |
| Hs.28491  | NM_002970    | spermidine/spermine N1-acetyltransferase 1                                                                        | DA865983 |
| Hs.514821 | NM_002985    | chemokine (C-C motif) ligand 5                                                                                    | DB507727 |
| Hs.591014 | NM_003006    | selectin P ligand                                                                                                 | BE246772 |
| Hs.368592 | NM_003105    | sortilin-related receptor, L(DLR class) A repeats-containing                                                      | DA943677 |
| Hs.479670 | NM_003215    | tec protein tyrosine kinase                                                                                       | BQ439373 |
| Hs.202470 | NM_003369    | UV radiation resistance associated gene                                                                           | DB042792 |
| Hs.388927 | NM_003403    | YY1 transcription factor                                                                                          | CN277269 |
| Hs.458414 | NM_003641    | interferon induced transmembrane protein 1 (9-27)                                                                 | CR984110 |
| Hs.159014 | NM_003913    | similar to hCG1820375; PRP4 pre-mRNA processing factor 4 homolog B (yeast)                                        | BX105115 |
| Hs.653214 | NM_003921    | B-cell CLL/lymphoma 10; hypothetical LOC646626                                                                    | DB549127 |
| Hs.14637  | NM_003960    | N-acetyltransferase 8 (GCN5-related, putative); N-acetyltransferase 8B (GCN5-related, putative, gene/pseudogene)  | DA427693 |
| Hs.535713 | NM_003965    | chemokine (C-C motif) receptor-like 2                                                                             | BU663015 |
| Hs.658389 | NM_003999    | oncostatin M receptor                                                                                             | DA342801 |
| Hs.172791 | NM_004182    | ubiquitously-expressed transcript                                                                                 | DB182705 |
| Hs.379414 | NM_004225    | malignant fibrous histiocytoma amplified sequence 1                                                               | DA933654 |

|           |           |                                                                                                                             |          |
|-----------|-----------|-----------------------------------------------------------------------------------------------------------------------------|----------|
| Hs.653138 | NM_004271 | lymphocyte antigen 86                                                                                                       | BM476525 |
| Hs.276925 | NM_004286 | GTP binding protein 1                                                                                                       | DA508915 |
| Hs.469649 | NM_004336 | budding uninhibited by benzimidazoles 1 homolog (yeast)                                                                     | BX095620 |
| Hs.377010 | NM_004341 | carbamoyl-phosphate synthetase 2, aspartate transcarbamylase, and dihydroorotase                                            | BI826073 |
| Hs.477481 | NM_004526 | minichromosome maintenance complex component 2                                                                              | BQ212950 |
| Hs.591589 | NM_004836 | eukaryotic translation initiation factor 2-alpha kinase 3                                                                   | CF130785 |
| Hs.601591 | NM_005124 | nucleoporin 153kDa                                                                                                          | DB024632 |
| Hs.524399 | NM_005480 | trophinin associated protein (tastin)                                                                                       | DB063306 |
| Hs.181042 | NM_005509 | Dmx-like 1                                                                                                                  | DB288884 |
| Hs.89497  | NM_005573 | lamin B1                                                                                                                    | BX111985 |
| Hs.656905 | NM_005575 | leucyl/cystinyl aminopeptidase                                                                                              | CF121450 |
| Hs.114545 | NM_005683 | G protein-coupled receptor 55                                                                                               | BX089187 |
| Hs.433512 | NM_005721 | ARP3 actin-related protein 3 homolog (yeast)                                                                                | DB153264 |
| Hs.518513 | NM_005781 | tyrosine kinase, non-receptor, 2                                                                                            | BM840152 |
| Hs.571037 | NM_005891 | acetyl-Coenzyme A acetyltransferase 2                                                                                       | BI600786 |
| Hs.477693 | NM_006153 | NCK adaptor protein 1                                                                                                       | BE274318 |
| Hs.333907 | NM_006255 | protein kinase C, eta                                                                                                       | BM019207 |
| Hs.472838 | NM_006282 | serine/threonine kinase 4                                                                                                   | DB052793 |
| Hs.201641 | NM_006317 | brain abundant, membrane attached signal protein 1                                                                          | DB530624 |
| Hs.176615 | NM_006438 | collectin sub-family member 10 (C-type lectin)                                                                              | DB519943 |
| Hs.486360 | NM_006476 | ATP synthase, H+ transporting, mitochondrial F0 complex, subunit G                                                          | BU538441 |
| Hs.519162 | NM_006763 | BTG family, member 2                                                                                                        | AU132458 |
| Hs.503093 | NM_006887 | zinc finger protein 36, C3H type-like 2                                                                                     | N39715   |
| Hs.488237 | NM_007053 | CD160 molecule                                                                                                              | DC306086 |
| Hs.443976 | NM_007186 | centrosomal protein 250kDa                                                                                                  | BI913469 |
| Hs.436439 | NM_007284 | twinfilin, actin-binding protein, homolog 2 (Drosophila)                                                                    | DA934269 |
| Hs.473286 | NM_012384 | glucocorticoid modulatory element binding protein 2                                                                         | BQ220589 |
| Hs.162989 | NM_013309 | solute carrier family 30 (zinc transporter), member 4                                                                       | CF137512 |
| Hs.279567 | NM_013362 | zinc finger protein 225                                                                                                     | AL539410 |
| Hs.504249 | NM_014026 | decapping enzyme, scavenger                                                                                                 | BM704823 |
| Hs.516674 | NM_014140 | SWI/SNF related, matrix associated, actin dependent regulator of chromatin, subfamily a-like 1                              | CD105158 |
| Hs.178499 | NM_014155 | zinc finger and BTB domain containing 44                                                                                    | BI464793 |
| Hs.40758  | NM_014488 | RAB30, member RAS oncogene family                                                                                           | BU664621 |
| Hs.224616 | NM_014674 | ER degradation enhancer, mannosidase alpha-like 1                                                                           | BG501732 |
| Hs.491805 | NM_014729 | thymocyte selection-associated high mobility group box Rho GTPase activating protein 11B; Rho GTPase activating protein 11A | BX325002 |
| Hs.591130 | NM_014783 | helicase with zinc finger                                                                                                   | CD557386 |
| Hs.370140 | NM_014877 | spen homolog, transcriptional regulator (Drosophila)                                                                        | BG707059 |
| Hs.558463 | NM_015001 | microtubule associated serine/threonine kinase 3                                                                            | DA956965 |
| Hs.466184 | NM_015016 | WD and tetratricopeptide repeats 1                                                                                          | BE244073 |
| Hs.469154 | NM_015023 | ATG2 autophagy related 2 homolog A (S. cerevisiae)                                                                          | BU561113 |
| Hs.370671 | NM_015104 | KIAA0746 protein                                                                                                            | DA450442 |
| Hs.479384 | NM_015187 | ubiquitin specific peptidase 24                                                                                             | DA598685 |
| Hs.477009 | NM_015306 | Rho/Rac guanine nucleotide exchange factor (GEF) 18                                                                         | BX112869 |
| Hs.465761 | NM_015318 | KIAA0776                                                                                                                    | AA745017 |
| Hs.149367 | NM_015323 |                                                                                                                             | CK818769 |



|           |           |                                                                                                                                 |          |
|-----------|-----------|---------------------------------------------------------------------------------------------------------------------------------|----------|
| Hs.534041 | NM_015703 | ribosomal RNA processing 7 homolog B ( <i>S. cerevisiae</i> );<br>ribosomal RNA processing 7 homolog A ( <i>S. cerevisiae</i> ) | BI918881 |
| Hs.107740 | NM_016270 | Kruppel-like factor 2 (lung)                                                                                                    | BX102733 |
| Hs.439474 | NM_016580 | protocadherin 12                                                                                                                | W23879   |
| Hs.186649 | NM_017439 | pigeon homolog ( <i>Drosophila</i> )                                                                                            | BG498372 |
| Hs.291587 | NM_017519 | AT rich interactive domain 1B (SWI1-like)                                                                                       | DB452091 |
| Hs.7036   | NM_017567 | N-acetylglucosamine kinase                                                                                                      | DA173998 |
| Hs.495473 | NM_017617 | Notch homolog 1, translocation-associated ( <i>Drosophila</i> )                                                                 | BG506743 |
| Hs.632423 | NM_017619 | RNA-binding region (RNP1, RRM) containing 3                                                                                     | BX118254 |
| Hs.356216 | NM_017709 | family with sequence similarity 46, member C                                                                                    | BX088863 |
| Hs.445036 | NM_017759 | INO80 complex subunit D                                                                                                         | BG709268 |
| Hs.136247 | NM_017794 | KIAA1797                                                                                                                        | BG545727 |
| Hs.26516  | NM_018154 | ASF1 anti-silencing function 1 homolog B ( <i>S. cerevisiae</i> )                                                               | DB158055 |
| Hs.370927 | NM_018509 | leucine rich repeat containing 59                                                                                               | CR740889 |
| Hs.190518 | NM_018944 | chromosome 21 open reading frame 45                                                                                             | BG209386 |
| Hs.31498  | NM_019026 | transmembrane and coiled-coil domains 1                                                                                         | DA372343 |
| Hs.4859   | NM_020307 | cyclin L1                                                                                                                       | BG702730 |
| Hs.657268 | NM_020367 | poly (ADP-ribose) polymerase family, member 11                                                                                  | AA394226 |
| Hs.512686 | NM_022082 | solute carrier family 17, member 9                                                                                              | BG754842 |
| Hs.12646  | NM_022750 | poly (ADP-ribose) polymerase family, member 12                                                                                  | DB448623 |
| Hs.573143 | NM_024007 | early B-cell factor 1                                                                                                           | BX472699 |
| Hs.146079 | NM_024631 | chromosome 11 open reading frame 61                                                                                             | DB225236 |
| Hs.407918 | NM_024652 | leucine-rich repeat kinase 1                                                                                                    | BM458585 |
| Hs.557850 | NM_024901 | DENN/MADD domain containing 2D                                                                                                  | AL598808 |
| Hs.436585 | NM_024939 | epithelial splicing regulatory protein 2                                                                                        | DC401602 |
| Hs.518767 | NM_025009 | centrosomal protein 135kDa                                                                                                      | BG546195 |
| Hs.46468  | NM_030937 | cyclin L2; chemokine (C-C motif) receptor 6                                                                                     | AL558525 |
| Hs.470654 | NM_031942 | cell division cycle associated 7                                                                                                | N86998   |
| Hs.100914 | NM_032142 | centrosomal protein 192kDa                                                                                                      | DB534134 |
| Hs.513933 | NM_032354 | transmembrane protein 107                                                                                                       | BX103636 |
| Hs.143681 | NM_032444 | BTB (POZ) domain containing 12                                                                                                  | BQ642510 |
| Hs.437126 | NM_032496 | Rho GTPase activating protein 9                                                                                                 | DB500113 |
| Hs.480848 | NM_032557 | ubiquitin specific peptidase 38                                                                                                 | DB168916 |
| Hs.493867 | NM_052862 | RCSD domain containing 1                                                                                                        | CR738977 |
| Hs.678910 | NM_052964 | cytokine-dependent hematopoietic cell linker                                                                                    | BG499001 |
| Hs.591815 | NM_053043 | RNA binding motif protein 33                                                                                                    | DA327688 |
| Hs.529984 | NM_054114 | T-cell activation RhoGTPase activating protein                                                                                  | BX463940 |
| Hs.406335 | NM_138348 | family with sequence similarity 105, member B                                                                                   | DB554239 |
| Hs.560100 | NM_138371 | family with sequence similarity 113, member B                                                                                   | CD520095 |
| Hs.131673 | NM_138426 | glucocorticoid induced transcript 1                                                                                             | DA116381 |
| Hs.118166 | NM_144973 | DENN/MADD domain containing 5B                                                                                                  | DA250246 |
| Hs.487143 | NM_145169 | SFT2 domain containing 1                                                                                                        | BF979543 |
| Hs.446309 | NM_145740 | glutathione S-transferase alpha 1<br>nephronophthisis 3 (adolescent); acyl-Coenzyme A                                           | DB222961 |
| Hs.511991 | NM_153240 | dehydrogenase family, member 11                                                                                                 | BI464882 |
| Hs.658997 | NM_153615 | ral guanine nucleotide dissociation stimulator-like 4                                                                           | H09045   |
| Hs.13768  | NM_172364 | calcium channel, voltage-dependent, alpha 2/delta subunit 4                                                                     | BE257747 |
| Hs.505601 | NM_174975 | SEC14-like 3 ( <i>S. cerevisiae</i> )                                                                                           | CD696106 |

|           |           |                                                                                                                                                                                                                                                            |          |
|-----------|-----------|------------------------------------------------------------------------------------------------------------------------------------------------------------------------------------------------------------------------------------------------------------|----------|
| Hs.355935 | NM_178336 | mitochondrial ribosomal protein L52                                                                                                                                                                                                                        | BI464175 |
| Hs.664861 | NM_178460 | signal-regulatory protein delta                                                                                                                                                                                                                            | BX088914 |
| Hs.59332  | NM_181784 | sprouty-related, EVH1 domain containing 2                                                                                                                                                                                                                  | BX954210 |
|           |           | RANBP2-like and GRIP domain containing 5; RANBP2-like and GRIP domain containing 4; RANBP2-like and GRIP domain containing 3; RANBP2-like and GRIP domain containing 8; RANBP2-like and GRIP domain containing 7; RANBP2-like and GRIP domain containing 6 |          |
| Hs.449164 | NM_182588 |                                                                                                                                                                                                                                                            | BM560441 |
| Hs.377992 | NM_182836 | Rab geranylgeranyltransferase, alpha subunit                                                                                                                                                                                                               | AV761815 |
| Hs.187636 | NM_198578 | leucine-rich repeat kinase 2                                                                                                                                                                                                                               | DA673065 |
| Hs.7155   | NM_207315 | cytidine monophosphate (UMP-CMP) kinase 2, mitochondrial                                                                                                                                                                                                   | DB163672 |
| Hs.920    | NM_212481 | AT rich interactive domain 5A (MRF1-like)                                                                                                                                                                                                                  | AL557700 |
