# Supplementary material
Source: PubMed Central journal article supplement (PMC3703829)

# Supplemental Figure 1

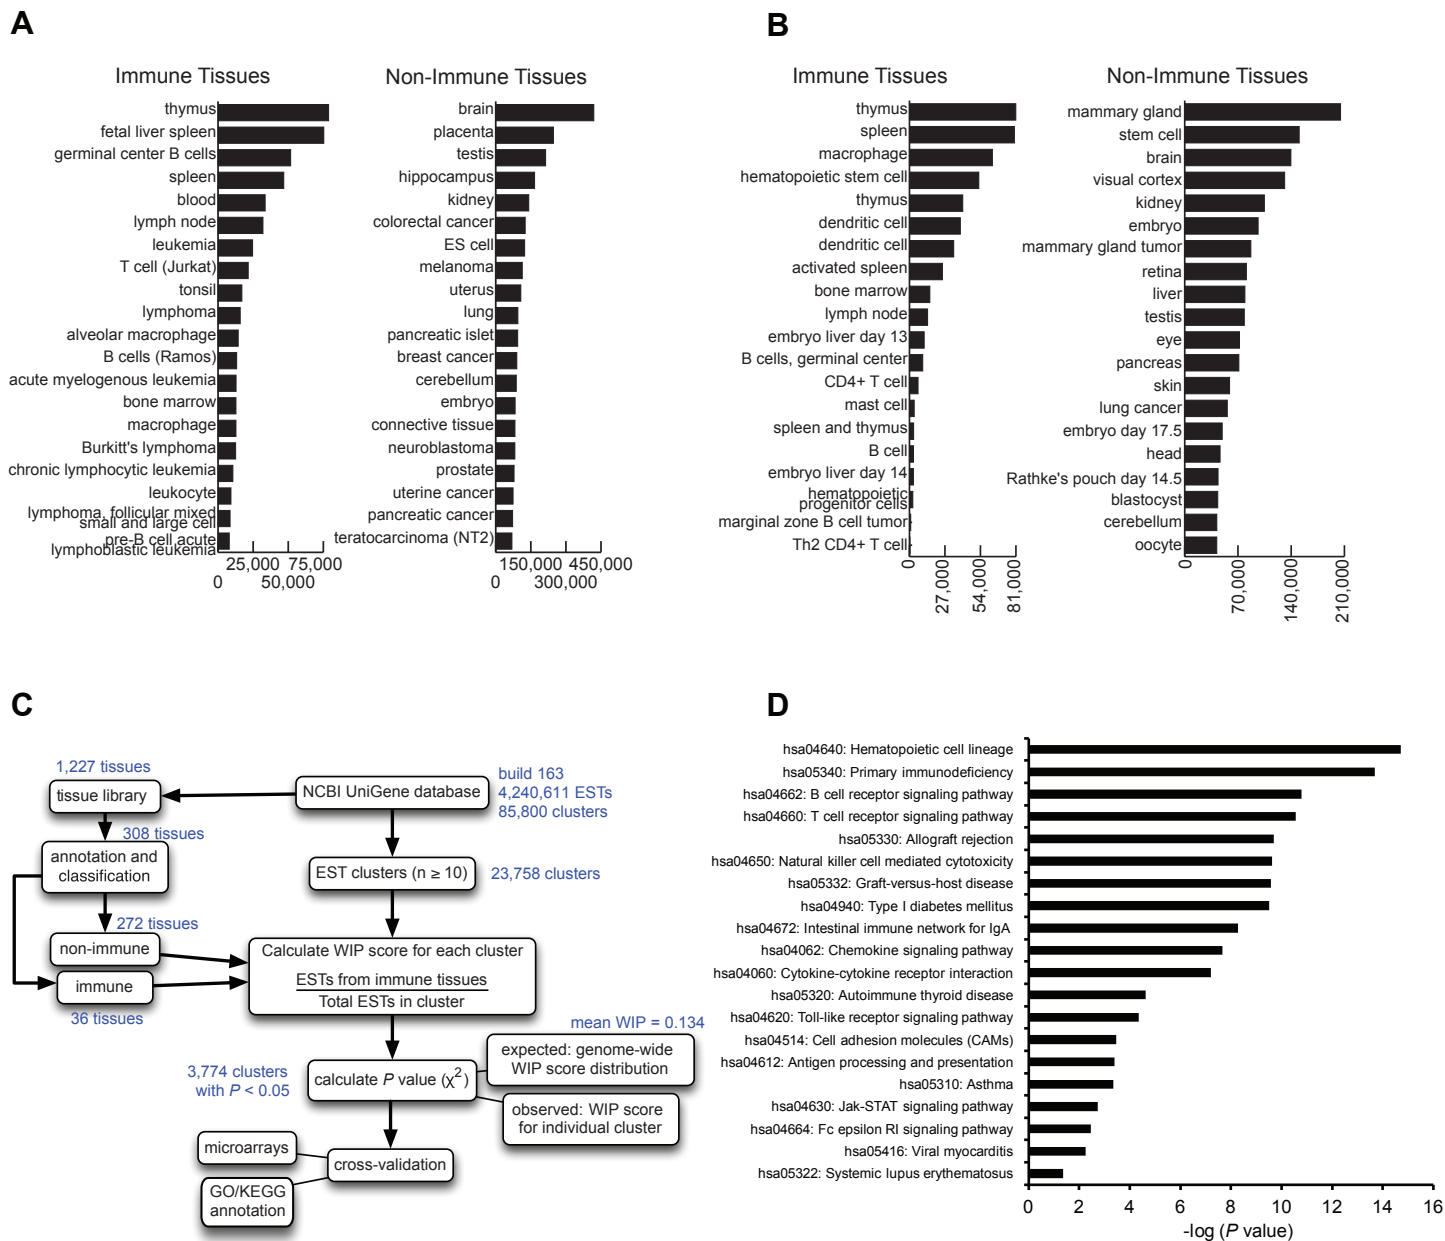

Supplement: NIHMS464744-supplement-1.pdf [file NIHMS464744-supplement-1.pdf]

# Supplemental Figure 2

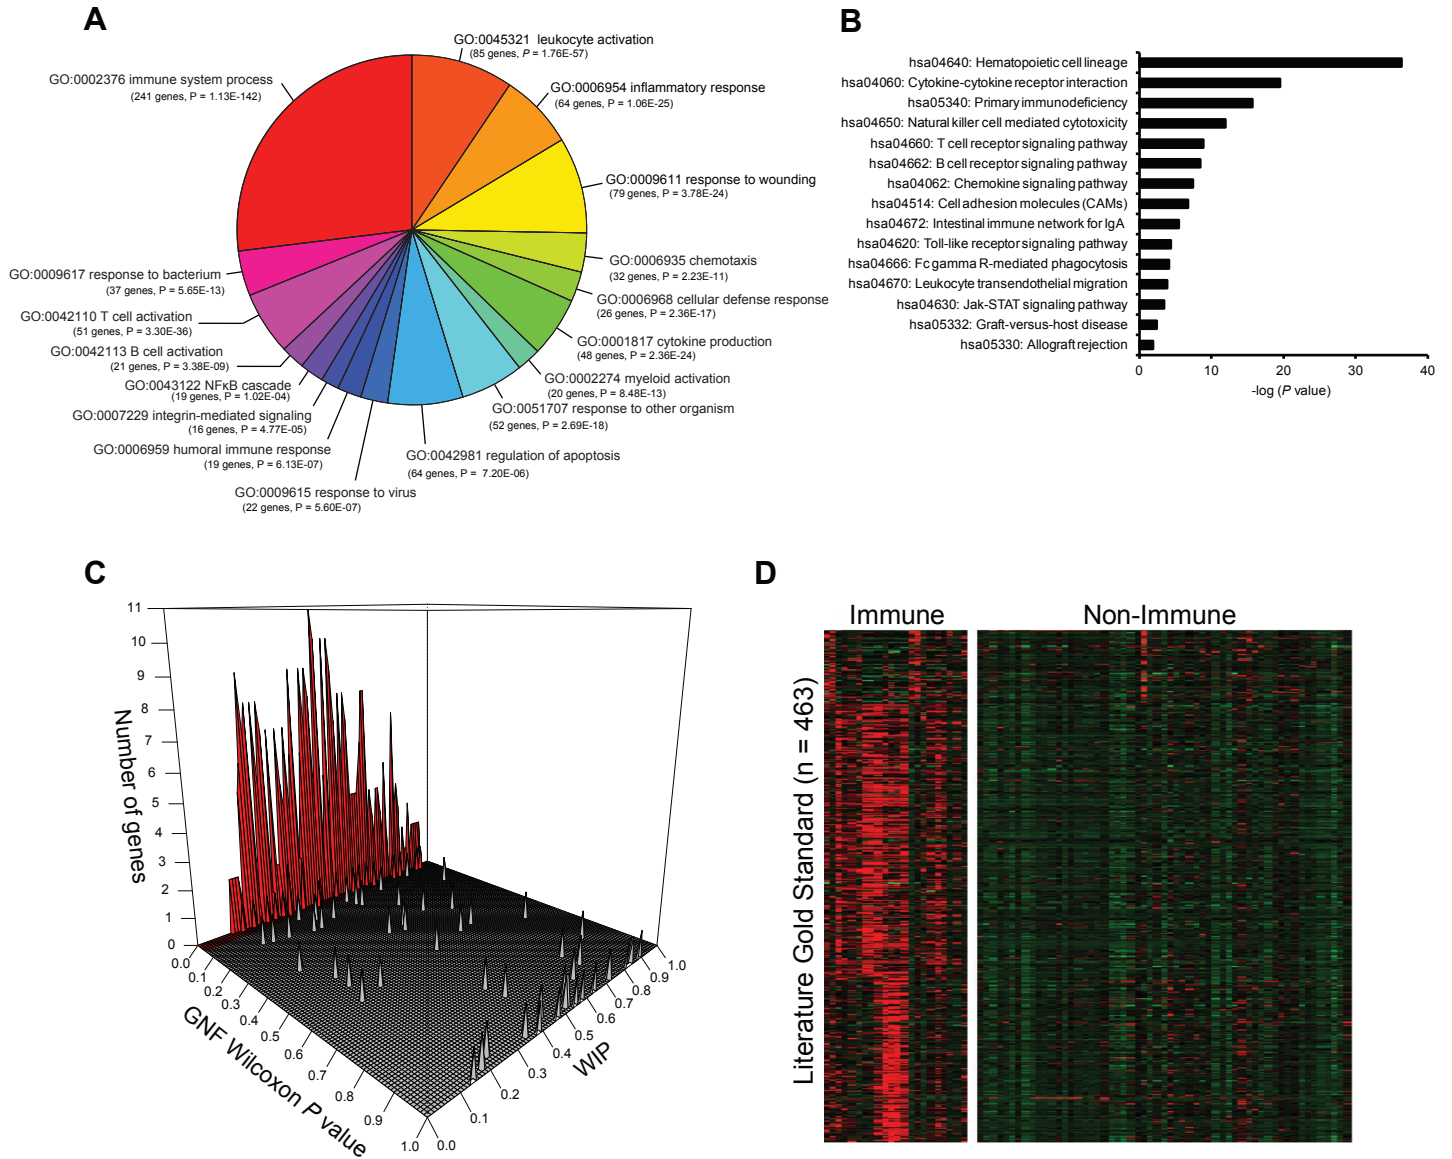

Supplement: NIHMS464744-supplement-2.pdf [file NIHMS464744-supplement-2.pdf]
